# Supplementary material for: Recessive TMOD1 mutation causes childhood cardiomyopathy
Source: Springer Nature journal article supplement (doi:10.1038/s42003-023-05670-9), 2024-01-02
Supplement: MOESM3 [file 42003_2023_5670_MOESM3_ESM.pdf]

## Description of Additional Supplementary Files

**File name:** Supplementary Data 1

**Description:** Source data for Figure 2 and Figure 4.

**File name:** Supplementary Video 1

**Description:** CMR imaging of Patient 1's heart.

**File name:** Supplementary Video 2

**Description:** CMR imaging of Patient 1's heart.

**File name:** Supplementary Video 3

**Description:** CMR imaging of Patient 2's heart.

**File name:** Supplementary Video 4

**Description:** CMR imaging of Patient 2's heart.

**File name:** Supplementary Video 5

**Description:** CMR imaging of Patient 3's heart.

**File name:** Supplementary Video 6

**Description:** CMR imaging of Patient 3's heart.
